# Supplementary material
Source: PubMed Central journal article supplement (PMC6172459)
Supplement: EMBR-19-e46198-s001.pdf [file EMBR-19-e46198-s001.pdf]

## Appendix

Concerted regulation of mitochondrial and nuclear non-coding RNAs by  
a dual-targeted RNase Z  
Siira *et al.*

### Table of Contents

**Figure S1. Related to Figures 3 and 5 | Loss of ELAC2 causes transcriptional changes in genes associated with both nuclear and mitochondrial function....2-3**

**Figure S2. Related to Figures 3 and 5 | Loss of ELAC2 causes transcriptional changes in genes associated with both nuclear and mitochondrial function....4-5**

**Figure S3. Related to Figures 3 and 5 | Loss of ELAC2 causes transcriptional changes in genes associated with both nuclear and mitochondrial function...6-7**

A

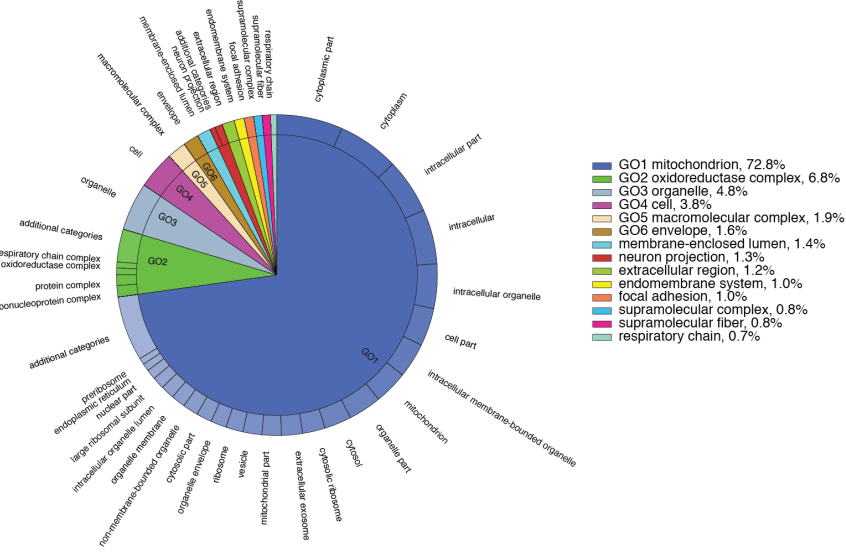

B

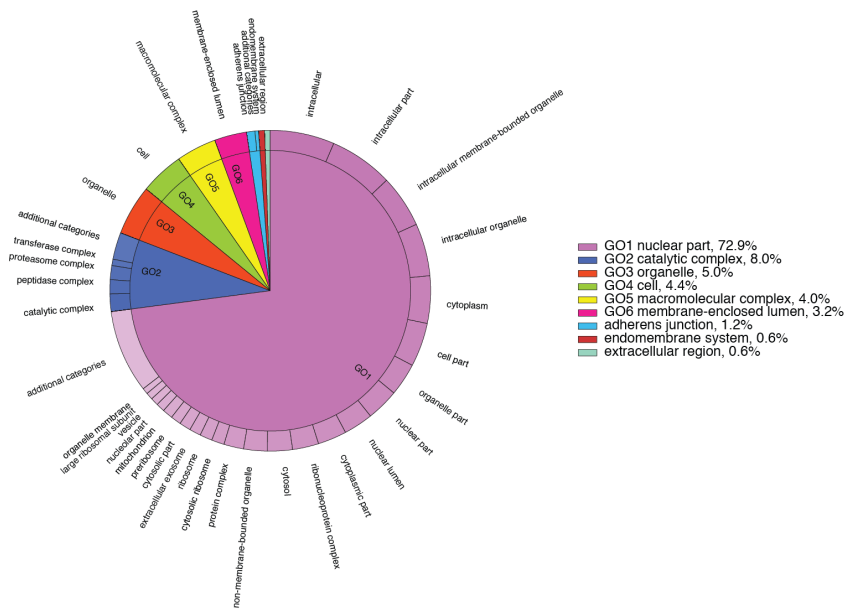

C

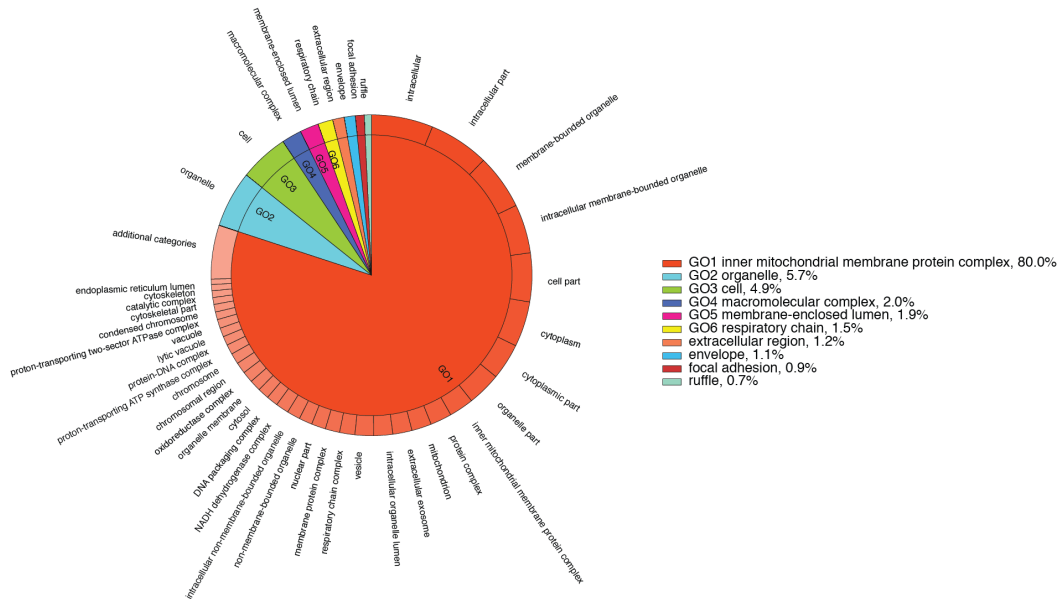

**Figure S1. Related to Figures 3 and 5 | Loss of ELAC2 causes transcriptional changes in genes associated with both nuclear and mitochondrial function.**

Differential analyses were carried out on the RNA-Seq datasets and the significant changes in gene expression were identified and represented by gene ontologies. We used a two-layer hierarchy gene ontology circular visualization, where the inner circle represents the most affected GO categories. The outer circle is composed of one or more of the gene ontologies that are subcategories of the main GO category. Each category of the inner circle is shown in the legend and supported with the related colour and text identifier “GO” of the main category related to the outer ring. Each subcategory (outer ring) within the main category (inner ring) was sorted based on absolute  $\log_{10}$  p-value from the smallest to largest, and a colour gradient is applied to highlight the largest to smallest value distribution to signify the greatest change found in the cellular component or process.

Gene ontologies are summarized for all the cellular compartment processes that are commonly altered between the *Elac2* and *Mrpp3* knockout mice compared to their respective controls (A), unique changes identified in the *Elac2* knockout mice compared to control mice (B) and unique changes identified in the *Mrpp3* knockout mice compared to control mice (C).

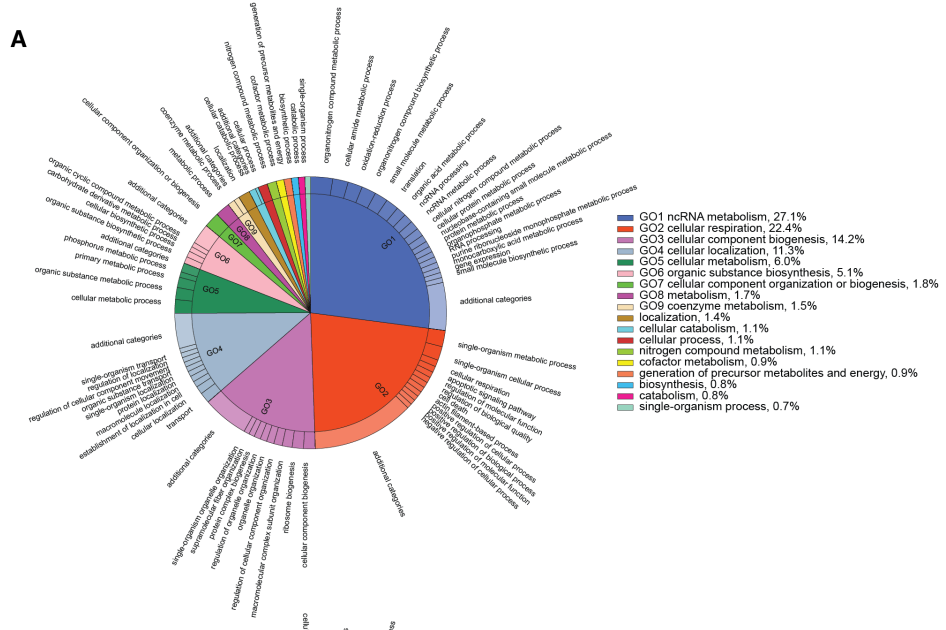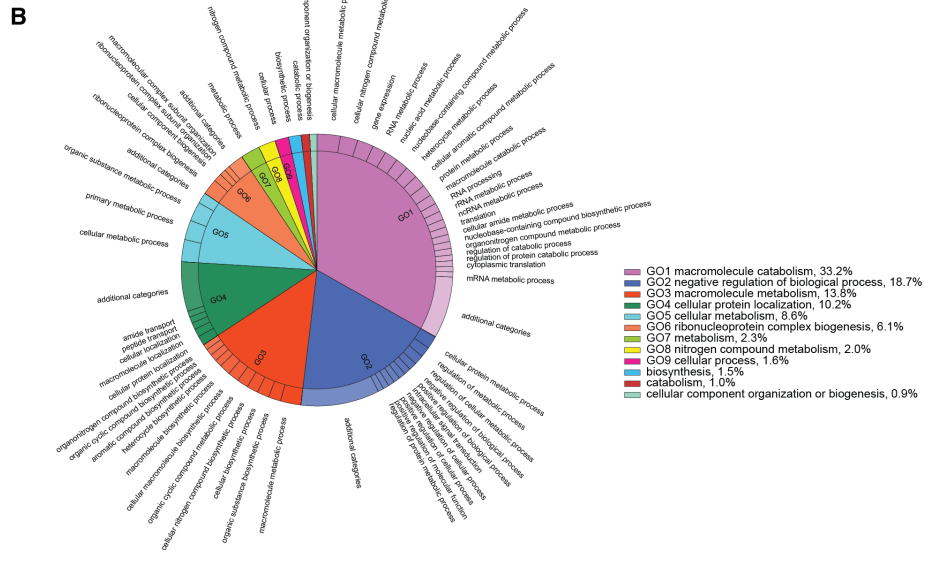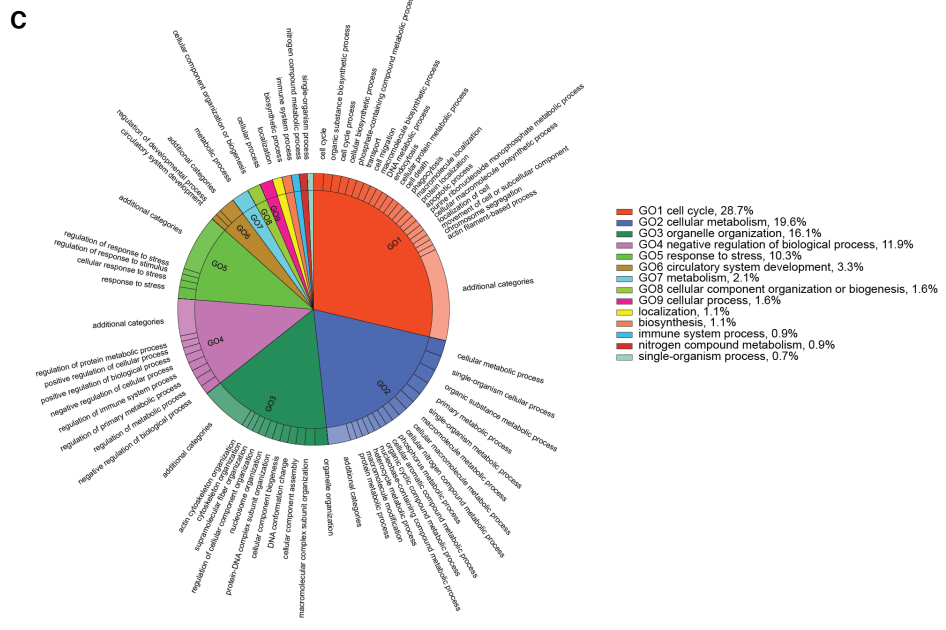

**Figure S2. Related to Figures 3 and 5 | Loss of ELAC2 causes transcriptional changes in genes associated with both nuclear and mitochondrial function.** Gene ontology summary of all biological processes that are commonly altered between the *Elac2* and *Mrpp3* knockout mice compared to their respective controls (A), unique changes identified in the *Elac2* knockout mice compared to control mice (B) and unique changes identified in the *Mrpp3* knockout mice compared to control mice (C).

**A**

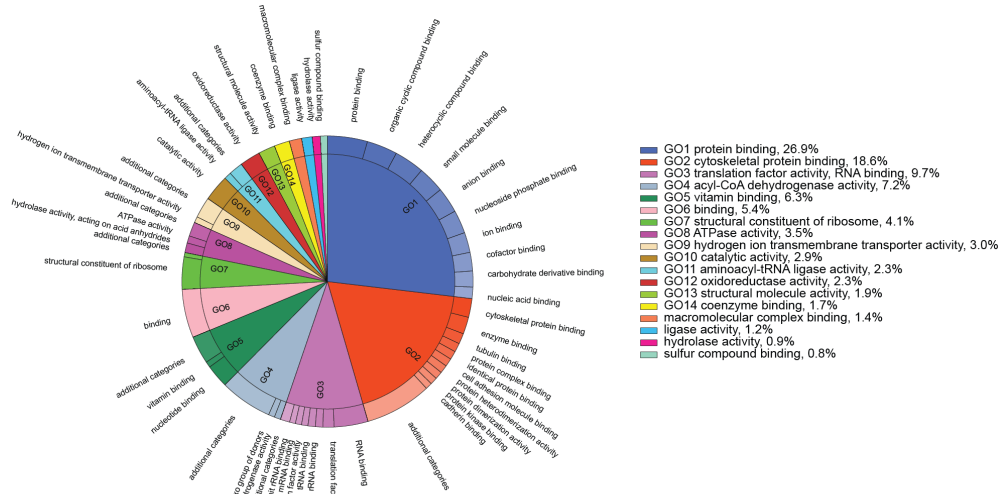

**B**

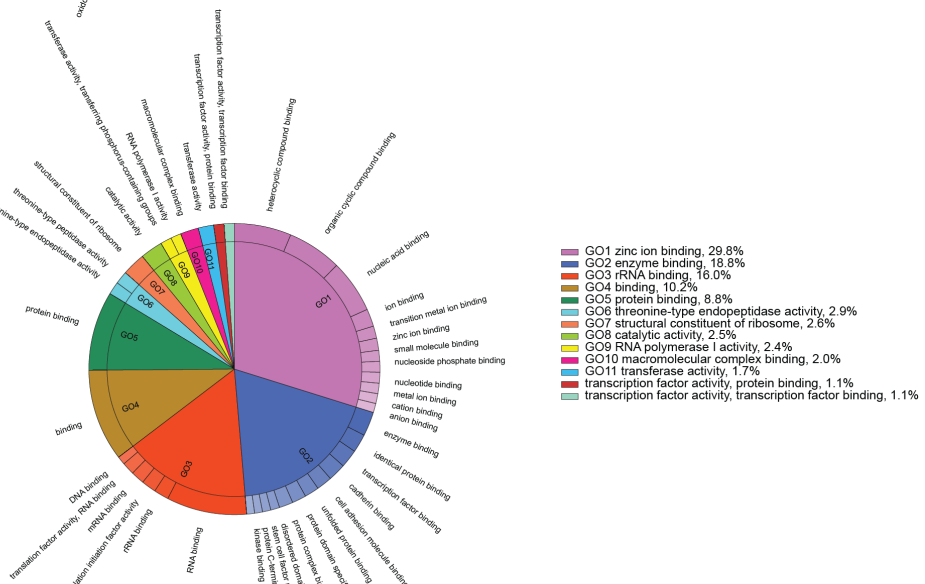

**C**

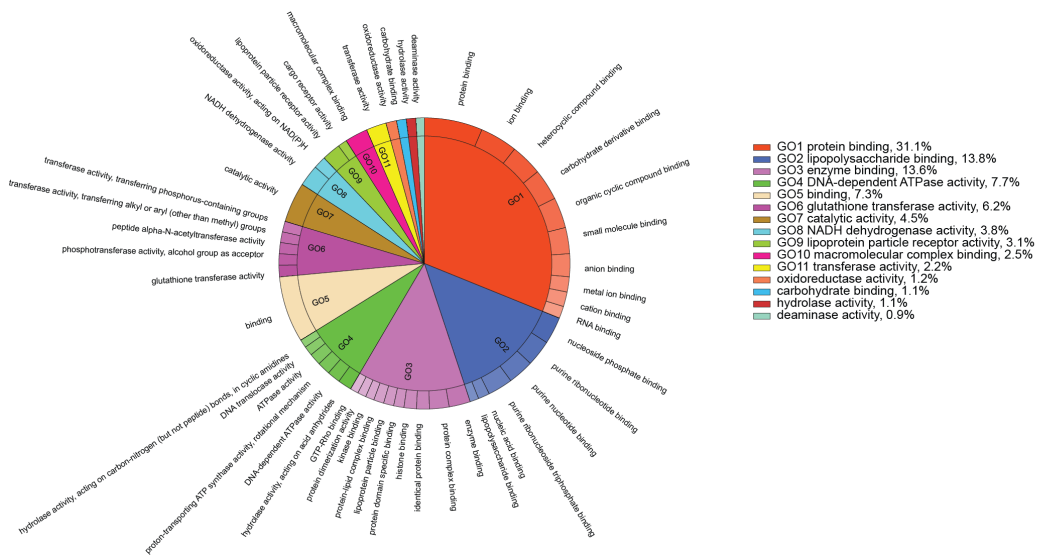

**Figure S3. Related to Figures 3 and 5 | Loss of ELAC2 causes transcriptional changes in genes associated with both nuclear and mitochondrial function.** Gene ontology summary of all molecular functions that are commonly altered between the *Elac2* and *Mrpp3* knockout mice compared to their respective controls (A), unique changes identified in the *Elac2* knockout mice compared to control mice (B) and unique changes identified in the *Mrpp3* knockout mice compared to control mice (C).
