# Supplementary material
Source: PubMed Central journal article supplement (PMC6172459)

Fig 2A

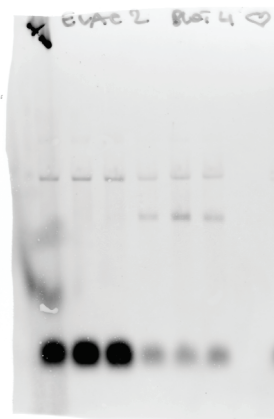

*mt-T11*

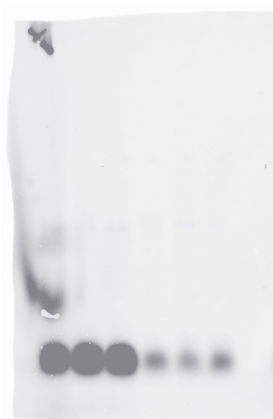

*mt-Tw*

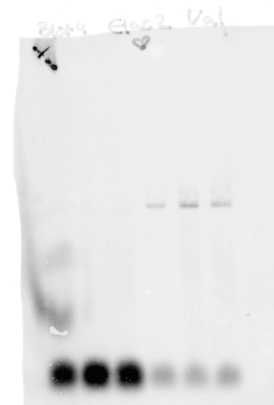

*mt-Tv*

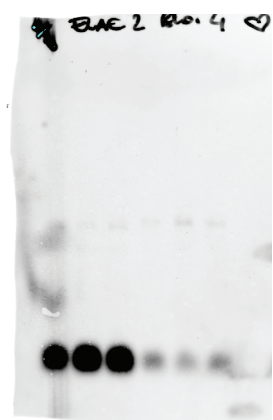

*mt-Ta*

Supplement: EMBR-19-e46198-s007.pdf [file EMBR-19-e46198-s007.pdf]

Fig 5F

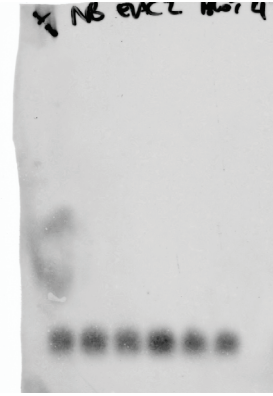

*n-Tk<sup>III</sup>*

Supplement: EMBR-19-e46198-s008.pdf [file EMBR-19-e46198-s008.pdf]

**Fig 6D**

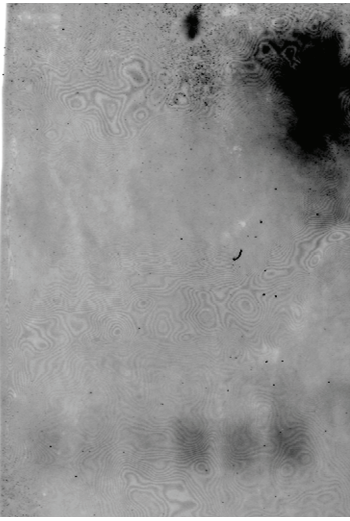

*snord43*

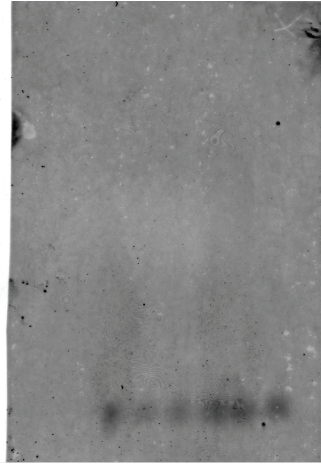

*snord83b*

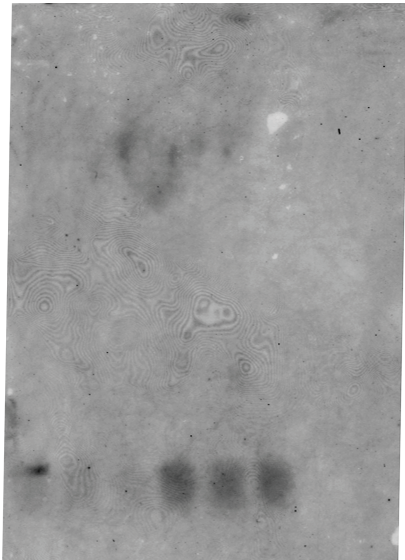

*snord65*

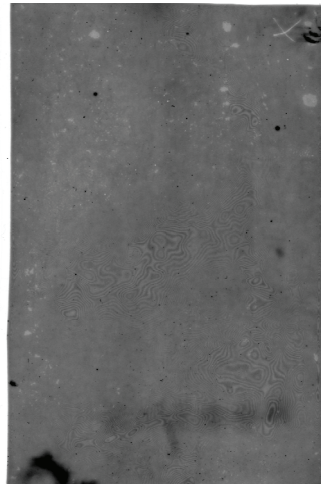

*miRlet7*

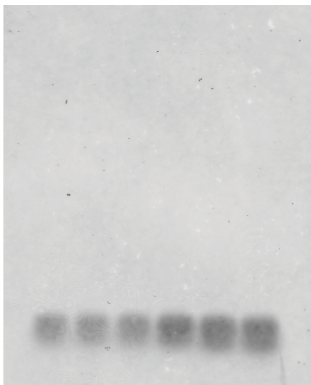

*mi27b*

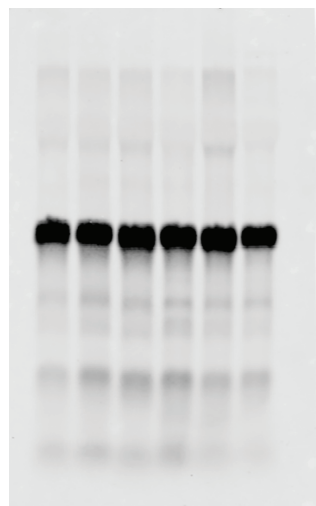

18S RNA

Supplement: EMBR-19-e46198-s009.pdf [file EMBR-19-e46198-s009.pdf]
